# Supplementary material for: Current advances and future outlook of heterogeneous catalytic transesterification towards biodiesel production from waste cooking oil
Source: Royal Society of Chemistry journal article supplement (doi:10.1039/d3se01564e), 2024-01-01
Supplement: d3se01564e1.pdf [file d3se01564e1.pdf]

## **Supplementary information**

### **Current advances and future outlook of heterogeneous catalytic transesterification towards biodiesel production from waste cooking oil**

Nabanita Ghosh<sup>1</sup>, Mehulee Patra<sup>1</sup>, Gopinath Halder\*<sup>1</sup>

<sup>1</sup>Department of Chemical Engineering, National Institute of Technology Durgapur, Durgapur-713209, West Bengal, India

\*Corresponding Author: Prof. Gopinath Halder

E-mail address: [gopinath.halder@che.nitdgp.ac.in](mailto:gopinath.halder@che.nitdgp.ac.in)

Ms. Nabanita Ghosh

E-mail address: [ng.21ch1102@phd.nitdgp.ac.in](mailto:ng.21ch1102@phd.nitdgp.ac.in)

Ms. Mehulee Patra

E-mail address: [mp.20u10808@btech.nitdgp.ac.in](mailto:mp.20u10808@btech.nitdgp.ac.in)

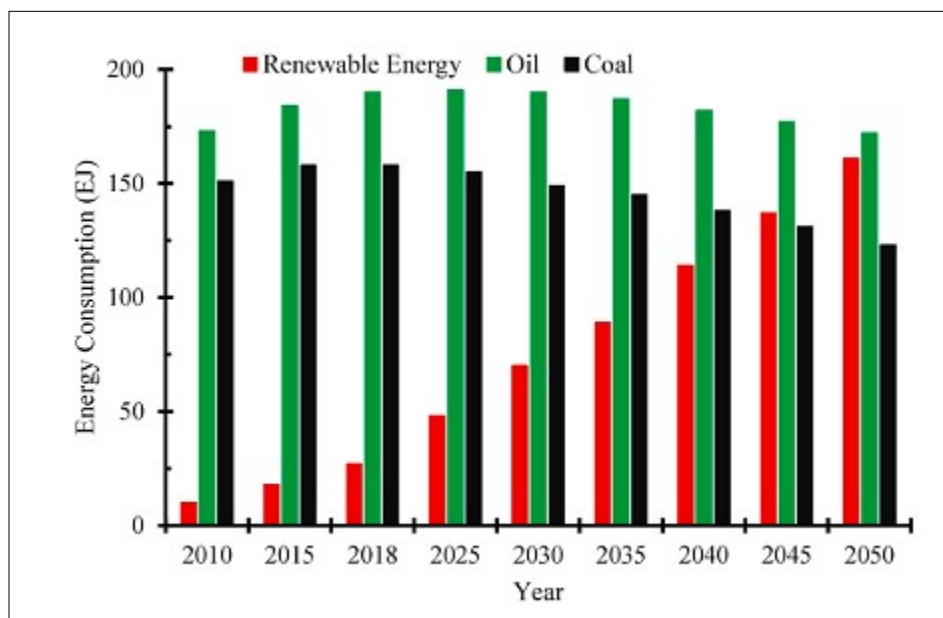

**Fig. S1.** Global coal, oil, and renewable energy (EJ) consumption and forecast to 2050. Reprinted figure with permission from [5]. Copyright (2021) Elsevier.

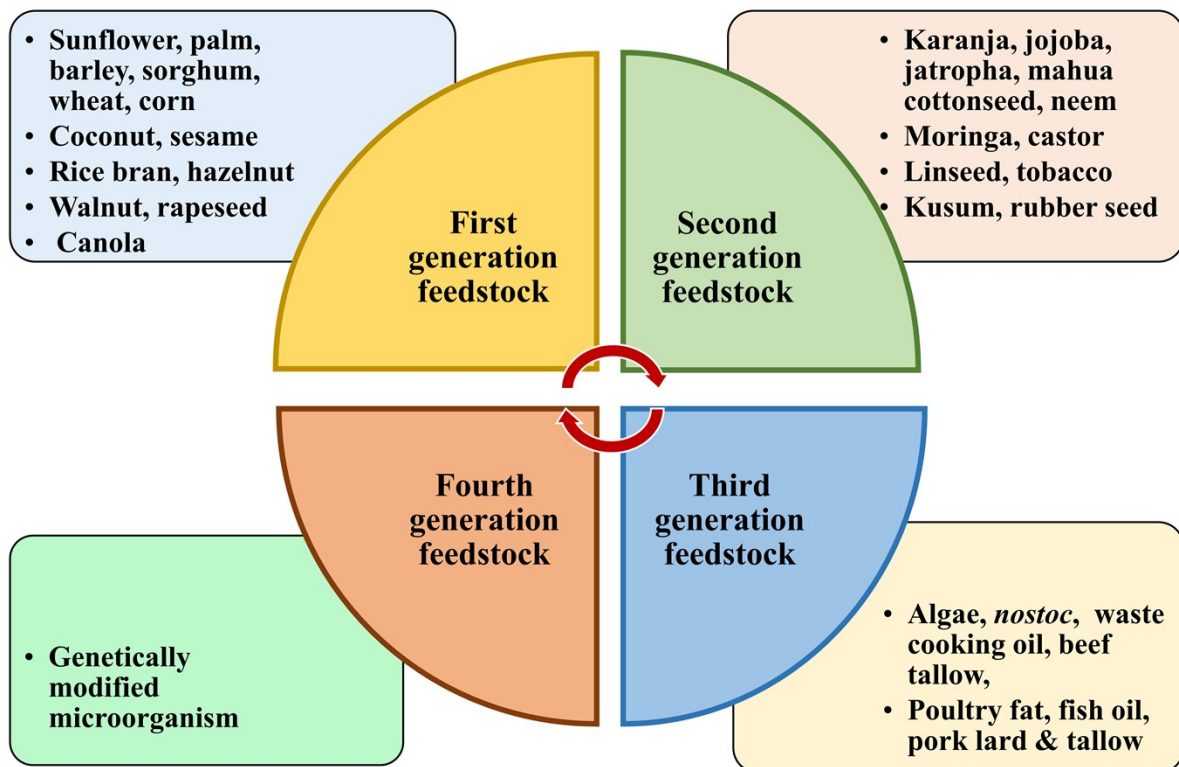

**Fig. S2.** Classification of feedstocks for the production of biodiesel.

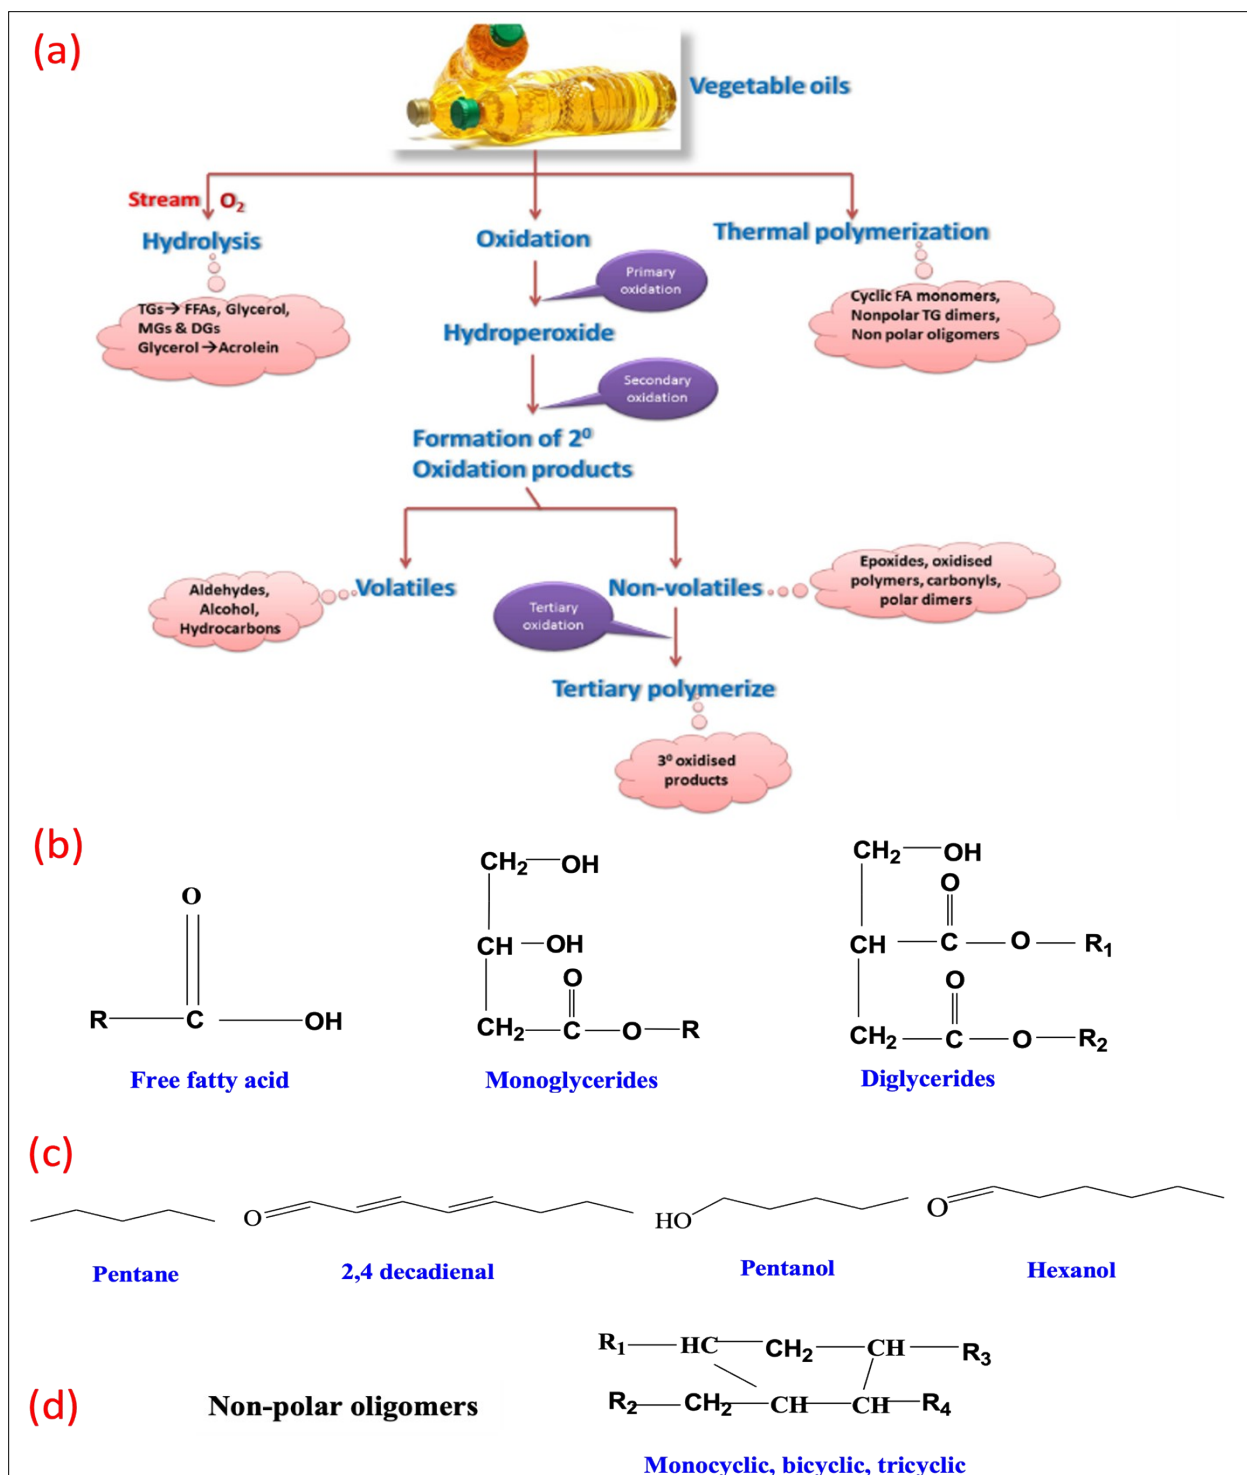

**Fig S3.** (a) Main events and products formed during the deep-frying of food at high temperature. Reprinted figure with permission from [31]. Copyright (2021) ACS, (b) Hydrolysis reaction, (c) Oxidation reaction, and (d) Polymerisation reaction of Waste cooking oil.

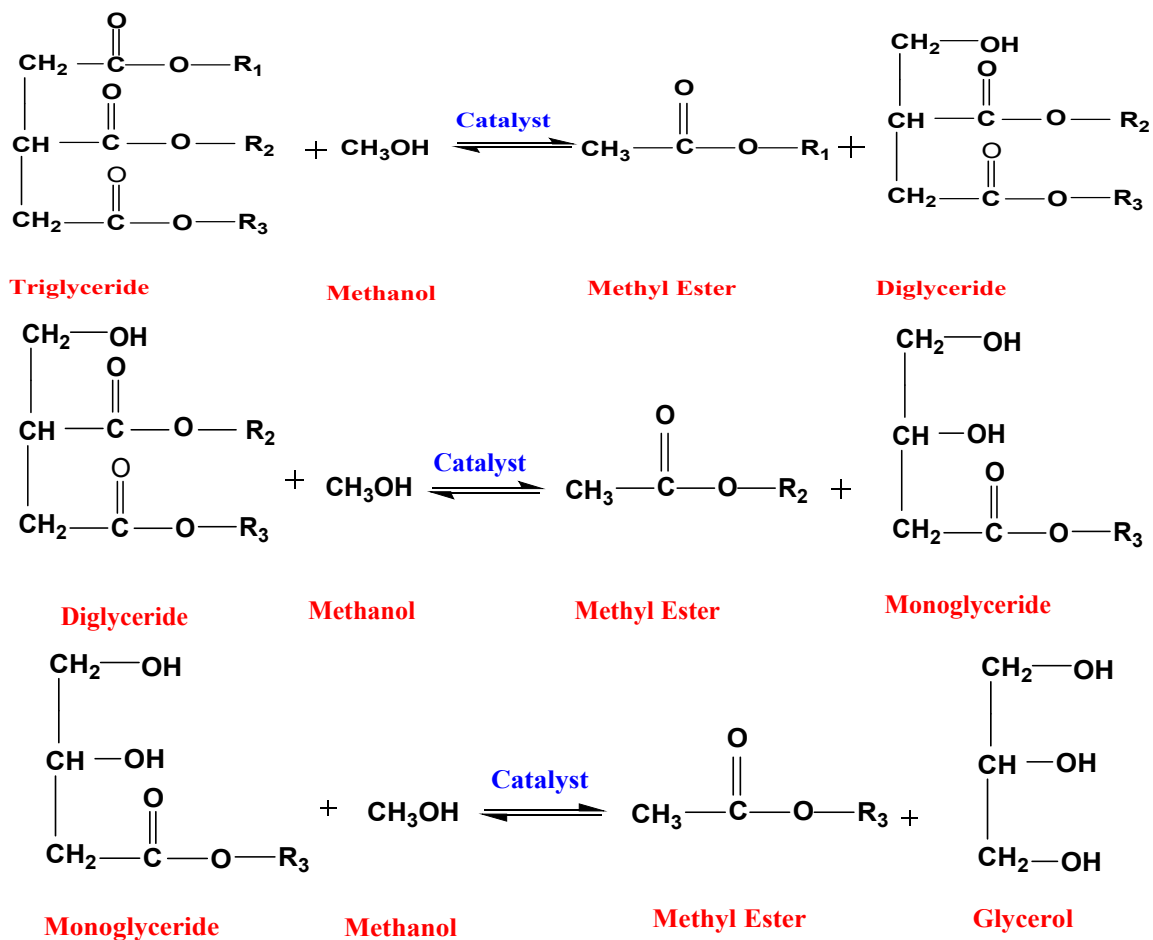

Fig. S4. Stoichiometric representation of individual steps of catalytic transesterification reaction mechanism. Reprinted figure with permission from [70]. Copyright (2022) Elsevier

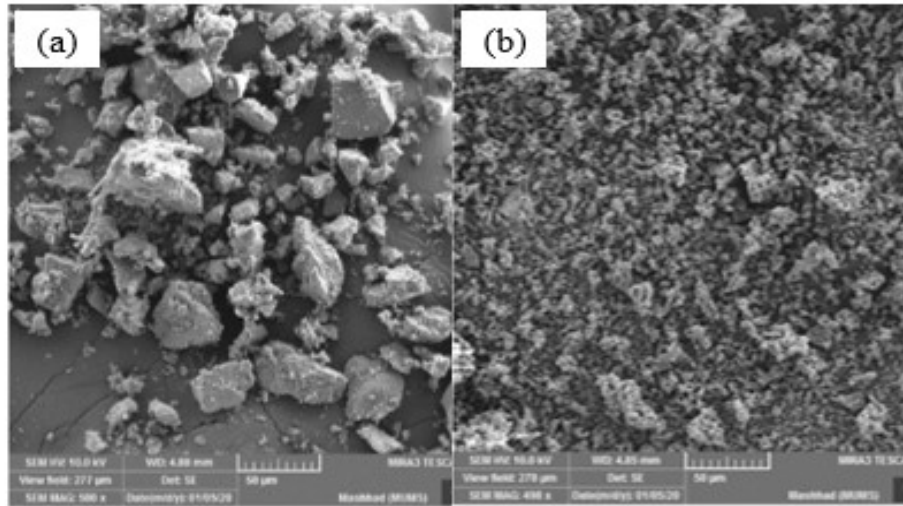

**Fig. S5.** FE-SEM image of raw chicken eggshells at different magnifications **(a)** and calcined chicken eggshells **(b)**. Reprinted figure with permission from [131]. Copyright (2022) Elsevier

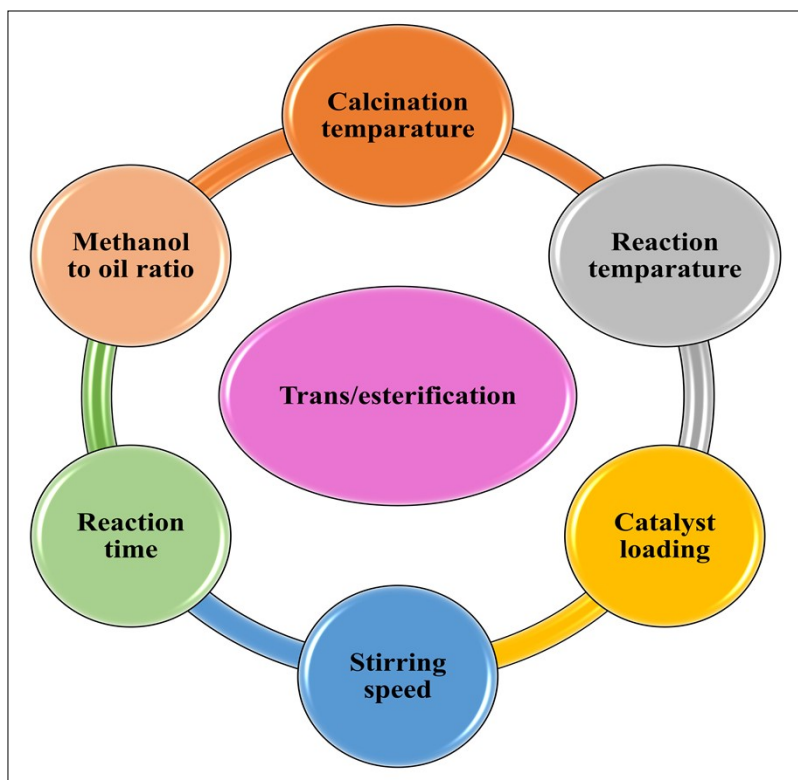

**Fig. S6.** Factors affecting Trans/esterification reaction.

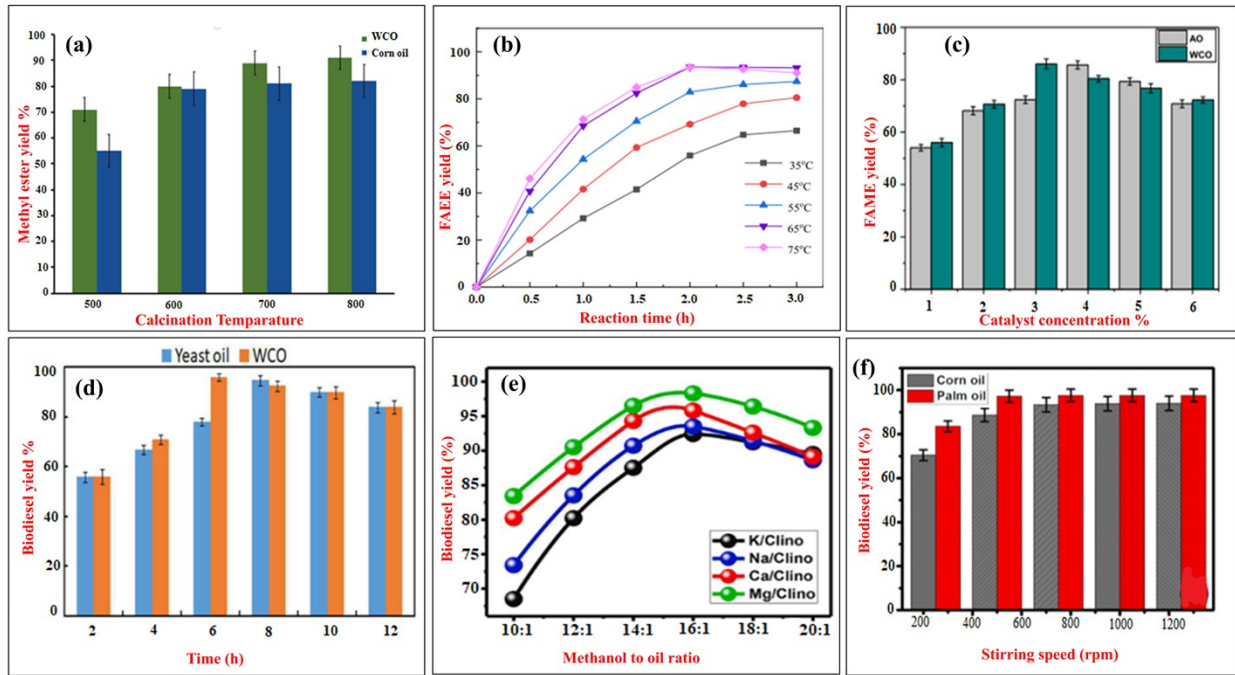

**Fig. S7.** Effect of (a) calcination temperature [183], (b) reaction temperature [180], (c) catalyst concentration [185], (d) reaction time [190], (e) methanol to oil ratio [195], (f) stirring speed [196] on biodiesel production.



**Table S1** Characteristics of Waste cooking oil used in the production of biodiesel

| Feedstock           | Viscosity (mm <sup>2</sup> /s) at 40 °C | Density (g/ml) | Acid value (mg KOH/g oil) | Kinematic viscosity at 40°C (mm <sup>2</sup> /s) | Free fatty acid value % | Saponification value (mg KOH/g oil) | Flash point (°C) | Ref   |
|---------------------|-----------------------------------------|----------------|---------------------------|--------------------------------------------------|-------------------------|-------------------------------------|------------------|-------|
| Waste cooking oil   | 68.21                                   | 0.9062         | 1.53                      | -                                                | -                       | 204.6                               | -                | [330] |
| Waste cooking oil   | -                                       | 0.916          | 35.4                      | -                                                | 18                      | 234.71                              | -                | [347] |
| Waste palm oil      | 29.92 ± 0.62                            | 900 ± 2.21     | 1.88 ± 0.45               | -                                                | 1.10 ± 0.056            | 188 ± 0.62                          | -                | [348] |
| Waste sunflower oil | -                                       | 0.920          | -                         | 41.34                                            | 0.06                    | 193                                 | -                | [177] |
| Waste cooking oil   | 4.76                                    | 0.82           | 35.9                      | -                                                | 17.95                   | 147.2                               | -                | [178] |
| Waste cooking oil   | 4.54                                    | 0.91           | 3.75                      | -                                                | -                       | 194.4                               | -                | [191] |
| Waste cooking oil   | -                                       | 0.920          | -                         | 33                                               | 17.5                    | 173                                 | -                | [349] |
| Waste frying oil    | 35.06                                   | 0.896          | 1.948                     | -                                                | 0.974                   | -                                   | -                | [200] |
| Waste frying oil    | 32.6                                    | 0.9258         | 5.78                      | -                                                | 2.9                     | -                                   | -                | [201] |
| Waste cooking oil   | -                                       | 0.905          | 0.7-0.8                   | 31                                               | 3                       | -                                   | 240              | [350] |
| Waste cooking oil   | -                                       | 0.944          | 1.41                      | 18                                               | -                       | 200.33                              | -                | [153] |
| Waste date seed oil | 23.56                                   | 0.92           | 20                        | -                                                | -                       | 236                                 | -                | [164] |
| Waste palm oil      | 32                                      | 0.902          | 1.9                       | -                                                | 1                       | 201.5                               | -                | [351] |

|                                                                             |                       |                      |       |                       |                     |        |     |       |
|-----------------------------------------------------------------------------|-----------------------|----------------------|-------|-----------------------|---------------------|--------|-----|-------|
| Waste cooking oil                                                           | 88.6                  | 0.92                 | 1.25  | -                     | -                   | 197    | -   | [215] |
| Waste cooking oil                                                           | 58.31                 | 0.920                | 3.08  | 63.38                 | 1.54                | -      | -   | [37]  |
| Waste animal tallow                                                         | -                     | 0.95                 | 9.38  | 46                    | 4.3                 | -      | 235 | [219] |
| Waste cooking oil                                                           | 4.54                  | 0.91                 | 3.75  | -                     | -                   | 194.4  | -   | [191] |
| Waste cooking oil                                                           | 31.524 ( $\pm$ 0.012) | 0.908 ( $\pm$ 0.002) |       | 35.023 ( $\pm$ 0.011) | 1.269 ( $\pm$ 0.16) |        |     | [352] |
| Mixture of WCO and <i>Calophyllum inophyllum</i> oil                        | 49.27                 | 0.912                | 19.75 | 54.12                 | -                   | -      | -   | [353] |
| Waste Cooking Oil                                                           | 6.22                  | 0.981                | 5     | -                     | -                   | 186.45 | -   | [161] |
| Beef tallow animal fat                                                      | -                     | 0.943                | 4.82  | 24.6                  | 2.41                | 261.65 | 168 | [245] |
| Beef tallow blend with waste used vegetable oil                             | 22.3                  | 0.902                | 0.249 | -                     | 0.1745              | 180    | -   | [163] |
| Composite oil of <i>Pongamia pinnata</i> , animal fat and waste cooking oil | 44                    | 0.927                | 11    | -                     | 1.692               | -      | 245 | [354] |
| Waste Soybean Oil                                                           | -                     | 0.865                | 0.72  | -                     | 0.36                | 196.6  | -   | [355] |
| Waste palm oil                                                              | -                     | 0.970                | 10.3  | 24.1                  | 5.2                 | -      | 300 | [356] |
| Waste Cooking Oil                                                           | -                     | 0.91                 | 3.6   | 4.2                   | -                   | 207    | -   | [265] |
| Waste chicken fat                                                           | 13.2                  | 1.473                | 5.33  | -                     | 2.68                | 109.4  | -   | [339] |
